# Supplementary material for: Interventions for Lower Limb Lymphedema Following Gynecological Cancer: A Systematic Review and Meta-Analysis
Source: Research Square preprint supplement (doi:10.21203/rs.3.rs-7083022/v1), 2025-08-25
Supplement: Supplementary file 1 [file 4beb72945f307f8276b9c783.docx]

Supplementary Files 2

**
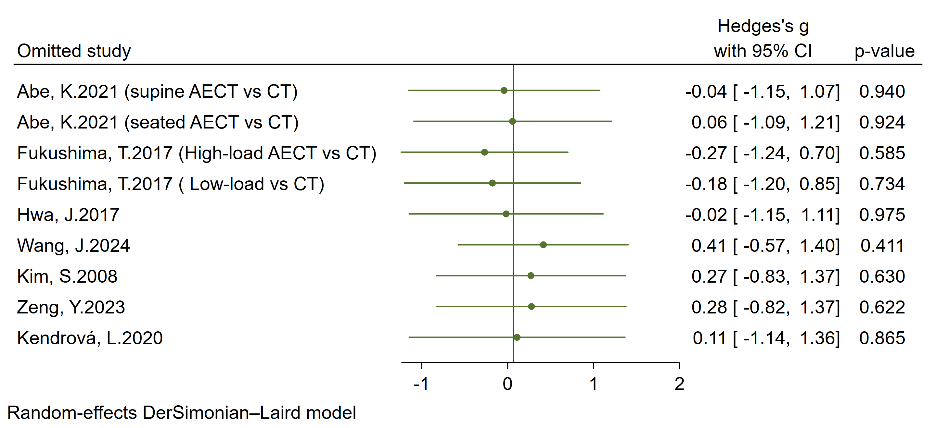
**

Sensitivity analysis for the Effect of interventions on lower limb volume

**
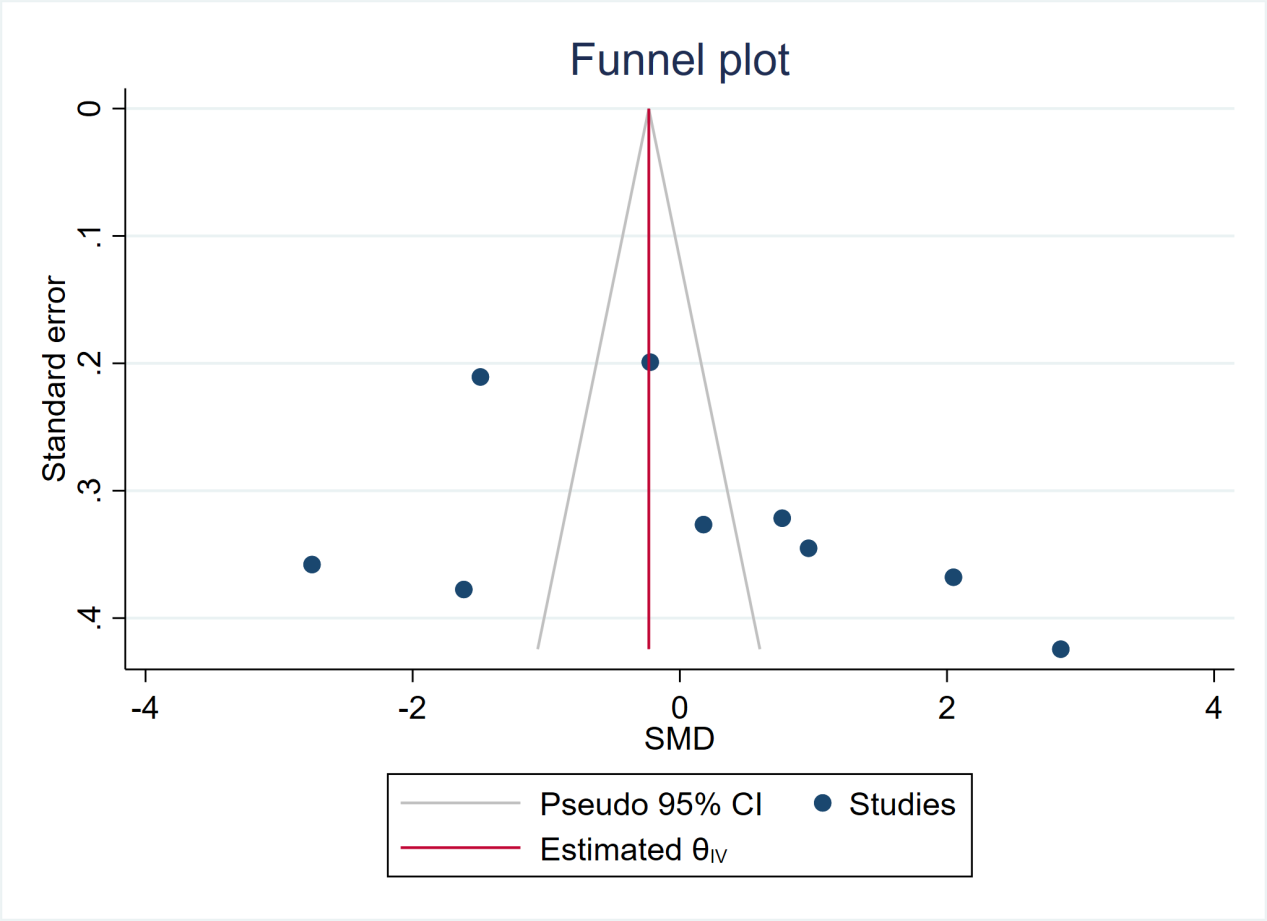
**

A funnel plot for the Effect of interventions on lower limb volume
