# Supplementary material for: Interventions for Lower Limb Lymphedema Following Gynecological Cancer: A Systematic Review and Meta-Analysis
Source: Research Square preprint supplement (doi:10.21203/rs.3.rs-7083022/v1), 2025-08-25
Supplement: Supplementary file 2 [file fc38f6fbcb49af9a6203a8e5.docx]

Supplementary Files 1

WEB OF SCIENCE (n= 130)

Table 1 Search strategy and results for WEB OF SCIENCE (2024-11-8 18:02)

| Search | Query | Items found |
| --- | --- | --- |
| #1 | Topic(gynecolog* OR gynaecolog* OR endometri* OR cervi* OR ocer* OR vagina*) | 469,016 |
| #2 | Topic(neoplas* OR tumor* OR tumour* OR cancer* OR malignan*) | 2,140,387 |
| #3 | #2 AND #1 | 103,730 |
| #4 | Topic(lymphedema* OR lymphoedem* OR lymph*tic) | 163,579 |
| #5 | Topic("lower extremit*" OR leg* OR "lower limb*" OR "extremit* lower" OR "limb*, lower" OR "membrum inferius") | 490,684 |
| #6 | #4 AND #5 | 3,845 |
| #7 | Topic(therap* OR nurs* OR rehabilitat* OR exercise* OR education* OR interven* OR treat* OR cure OR management OR car* OR recover* OR habilitation OR physiotherap* OR activit* OR massage* OR "manual lymph drainage") | 19,404,854 |
| #8 | #3 AND #6 AND #7 | 130 |

PUBMED (n= 362)

Table 2 Search strategy and results for PUBMED (2024-11-8 18:22)

| Search | Query | Items found |
| --- | --- | --- |
| #1 | ("Gynecology"[Mesh]) OR (gynecolog*[Title/Abstract] OR gynaecolog*[Title/Abstract] OR endometri*[Title/Abstract] OR cervi*[Title/Abstract] OR ocer*[Title/Abstract] OR vagina*[Title/Abstract]) | [638,975](https://pubmed.ncbi.nlm.nih.gov/?term=(gynecolog*[Title/Abstract]+OR+gynaecolog*[Title/Abstract]+OR+endometri*[Title/Abstract]+OR+cervi*[Title/Abstract]+OR+ocer*[Title/Abstract]+OR+vagina*[Title/Abstract])+OR+("Gynecology"[Mesh])&sort=) |
| #2 | ("Neoplasms"[Mesh]) OR (neoplas*[Title/Abstract] OR tumor*[Title/Abstract] OR tumour*[Title/Abstract] OR cancer*[Title/Abstract] OR malignan*[Title/Abstract]) | 5,337,319 |
| #3 | #2 AND #1 | 255,368 |
| #4 | ("Lymphedema"[Mesh]) OR (lymphedema*[Title/Abstract] OR lymphoedem*[Title/Abstract] OR lymph*tic[Title/Abstract]) | 187,620 |
| #5 | ("leg"[Mesh] OR "lower Extremity"[Mesh]) OR ("lower extremit*"[Title/Abstract] OR leg[Title/Abstract] OR legs[Title/Abstract] OR "lower limb*"[Title/Abstract] OR "extremit* lower"[Title/Abstract] OR "limb*, lower"[Title/Abstract] OR "membrum inferius"[Title/Abstract]) | 387,137 |
| #6 | #4 AND #5 | 6508 |
| #7 | ("Therapeutics"[Mesh] OR "therapy" [Subheading] OR "Nursing"[Mesh] OR "Rehabilitation"[Mesh] OR "Exercise"[Mesh] OR "Education"[Mesh]) OR (therap*[Title/Abstract] OR nurs*[Title/Abstract] OR rehabilitat*[Title/Abstract] OR exercise*[Title/Abstract] OR education*[Title/Abstract] OR interven*[Title/Abstract] OR treat*[Title/Abstract] OR cure[Title/Abstract] OR management[Title/Abstract] OR care[Title/Abstract] OR cares[Title/Abstract] OR caring[Title/Abstract] OR recover*[Title/Abstract] OR habilitation[Title/Abstract] OR physiotherap*[Title/Abstract] OR activit*[Title/Abstract] OR massage*[Title/Abstract] OR "manual lymph drainage"[Title/Abstract]) | 19,722,495 |
| #8 | #3 AND #6 AND #7 | 362 |

Cochrane Library (n= 68)

Table 3 Search strategy and results for Cochrane Library (2024-11-8 20:39)

| Search | Query | Items found |
| --- | --- | --- |
| #1 | MeSH descriptor: [Gynecology] explode all trees | 273 |
| #2 | (gynaecolog* OR gynecolog* OR endometri* OR cervi* OR ocer* OR vagina*):ti,ab,kw | 75992 |
| #3 | #1 OR #2 | 75992 |
| #4 | MeSH descriptor: [Neoplasms] explode all trees | 127536 |
| #5 | (tumor* OR tumour* OR cancer* OR malignan* OR neoplas*):ti,ab,kw | 280249 |
| #6 | #4 OR #5 | 293363 |
| #7 | #3 AND #6 | 17557 |
| #8 | MeSH descriptor: [Lymphedema] explode all trees | 952 |
| #9 | (lymphoedem*OR lymph*tic OR lymphedema*):ti,ab,kw | 1871 |
| #10 | #8 OR #9 | 2020 |
| #11 | MeSH descriptor: [Leg] explode all trees | 3695 |
| #12 | MeSH descriptor: [Lower Extremity] explode all trees | 10283 |
| #13 | ((lower limb*) OR (extremit*, lower) OR (limb*, lower) OR (membrum inferius) OR leg OR legs OR (lower extremit*)):ti,ab,kw | 53618 |
| #14 | #11 OR #12 OR #13 | 57161 |
| #15 | #10 AND #14 | 403 |
| #16 | MeSH descriptor: [Therapeutics] explode all trees | 436361 |
| #17 | MeSH descriptor: [Nursing] explode all trees | 4399 |
| #18 | MeSH descriptor: [Rehabilitation] explode all trees | 56209 |
| #19 | MeSH descriptor: [Exercise] explode all trees | 39777 |
| #20 | MeSH descriptor: [Education] explode all trees | 46497 |
| #21 | (therap* OR nurs* OR rehabilitat* OR exercise* OR education* OR interven* OR treat* OR cure OR management OR car* OR recover* OR habilitation OR physiotherap* OR activit* OR massage* OR (manual lymph drainage)):ti,ab,kw | 1861047 |
| #22 | #16 OR #17 OR #18 OR #19 OR #20 OR #21 | 1889015 |
| #23 | #7 AND #15 AND #22 | 68 |

MEDLINE (n=296)

Table 4 Search strategy and results for Cochrane Library (2024-11-8 22:27)

| Search | Query | Items found |
| --- | --- | --- |
| #1 | MH=(gynecology) | [21,398](https://lib-proxy.wmu.edu.cn/https/vpn/17/P7TXE55GPNSXT3LPMNTT6Z5MMF3GT7UBPSTT6Z5P/wos/medline/summary/e2d57735-2fae-40c4-aaec-8bd9d315d580-01225b1f5c/relevance/1) |
| #2 | (TI=(gynecolog* OR gynaecolog* OR endometri* OR cervi* OR ocer* OR vagina*)) OR AB=(gynecolog* OR gynaecolog* OR endometri* OR cervi* OR ocer* OR vagina*) | [622,204](https://lib-proxy.wmu.edu.cn/https/vpn/17/P7TXE55GPNSXT3LPMNTT6Z5MMF3GT7UBPSTT6Z5P/wos/medline/summary/f7b06056-1cdd-4b96-99e4-4e53d4662323-01225b9c6a/relevance/1) |
| #3 | #1 OR #2 | [628,203](https://lib-proxy.wmu.edu.cn/https/vpn/17/P7TXE55GPNSXT3LPMNTT6Z5MMF3GT7UBPSTT6Z5P/wos/medline/summary/ada8a26f-ead2-469a-8b7d-c190bc77cc5e-01225c14aa/relevance/1) |
| #4 | MH=(neoplasms) | [530,962](https://lib-proxy.wmu.edu.cn/https/vpn/17/P7TXE55GPNSXT3LPMNTT6Z5MMF3GT7UBPSTT6Z5P/wos/medline/summary/be11ade0-df3b-4c2b-9f08-ee35900ef17d-01225c28e3/relevance/1) |
| #5 | (TI=(neoplas* OR tumor* OR tumour* OR cancer* OR malignan*)) OR AB=(neoplas* OR tumor* OR tumour* OR cancer* OR malignan*) | [3,989,553](https://lib-proxy.wmu.edu.cn/https/vpn/17/P7TXE55GPNSXT3LPMNTT6Z5MMF3GT7UBPSTT6Z5P/wos/medline/summary/8b35a6e0-dce1-41a9-9032-1268338b4c8d-01225c4220/relevance/1) |
| #6 | #4 OR #5 | [4,095,179](https://lib-proxy.wmu.edu.cn/https/vpn/17/P7TXE55GPNSXT3LPMNTT6Z5MMF3GT7UBPSTT6Z5P/wos/medline/summary/70806bbe-7d62-450c-9da1-13dea33c36d1-01225c509c/relevance/1) |
| #7 | #3 AND #6 | [208,005](https://lib-proxy.wmu.edu.cn/https/vpn/17/P7TXE55GPNSXT3LPMNTT6Z5MMF3GT7UBPSTT6Z5P/wos/medline/summary/bf820d37-b994-486a-9b39-2597d434863d-01225c6288/relevance/1) |
| #8 | MH=(lymphedema) | [11,133](https://lib-proxy.wmu.edu.cn/https/vpn/17/P7TXE55GPNSXT3LPMNTT6Z5MMF3GT7UBPSTT6Z5P/wos/medline/summary/6ccfe6bc-0582-4247-8aaf-087b864afc4c-01225c6f80/relevance/1) |
| #9 | (TI=(lymphedema* OR lymphoedem* OR lymph*tic)) OR AB=(lymphedema* OR lymphoedem* OR lymph*tic) | [177,845](https://lib-proxy.wmu.edu.cn/https/vpn/17/P7TXE55GPNSXT3LPMNTT6Z5MMF3GT7UBPSTT6Z5P/wos/medline/summary/202df687-4bc9-4d30-a6b8-f4bdd9a2ffea-01225c8099/relevance/1) |
| #10 | #8 OR #9 | [180,360](https://lib-proxy.wmu.edu.cn/https/vpn/17/P7TXE55GPNSXT3LPMNTT6Z5MMF3GT7UBPSTT6Z5P/wos/medline/summary/dedd7e93-ea8b-423b-ba73-bd285d599a9f-01225c8999/relevance/1) |
| #11 | (MT=(lower extremity)) OR MT=(leg) | [13,943](https://lib-proxy.wmu.edu.cn/https/vpn/17/P7TXE55GPNSXT3LPMNTT6Z5MMF3GT7UBPSTT6Z5P/wos/medline/summary/0ece5d4a-dca5-4a45-90be-b4a6d998bb75-01225cb1fc/relevance/1) |
| #12 | (TI=("lower extremit*" OR leg* OR "lower limb*" OR "extremit* lower" OR "limb*, lower" OR "membrum inferius")) OR AB=("lower extremit*" OR leg* OR "lower limb*" OR "extremit* lower" OR "limb*, lower" OR "membrum inferius") | [529,679](https://lib-proxy.wmu.edu.cn/https/vpn/17/P7TXE55GPNSXT3LPMNTT6Z5MMF3GT7UBPSTT6Z5P/wos/medline/summary/2ac63399-c894-4163-be4d-5241d0ef31c2-01225cc920/relevance/1) |
| #13 | #11 OR #12 | [533,817](https://lib-proxy.wmu.edu.cn/https/vpn/17/P7TXE55GPNSXT3LPMNTT6Z5MMF3GT7UBPSTT6Z5P/wos/medline/summary/562168b4-1095-4600-9b30-ac29e76b12ea-01225ccd6b/relevance/1) |
| #14 | #10 AND #13 | [5,640](https://lib-proxy.wmu.edu.cn/https/vpn/17/P7TXE55GPNSXT3LPMNTT6Z5MMF3GT7UBPSTT6Z5P/wos/medline/summary/933c84d5-fd1e-45ae-901b-beb44f8ed8ed-01225ceab2/relevance/1) |
| #15 | ((((MH=(therapeutics)) OR MH=(nursing)) OR MH=(rehabilitation)) OR MH=(exercise)) OR MH=(education) | [252,329](https://lib-proxy.wmu.edu.cn/https/vpn/17/P7TXE55GPNSXT3LPMNTT6Z5MMF3GT7UBPSTT6Z5P/wos/medline/summary/91810002-db41-4776-84f5-aea29fa80713-01225d1369/relevance/1) |
| #16 | (TI=(therap* OR nurs* OR rehabilitat* OR exercise* OR education* OR interven* OR treat* OR cure OR management OR car* OR recover* OR habilitation OR physiotherap* OR activit* OR massage* OR "manual lymph drainage")) OR AB=(therap* OR nurs* OR rehabilitat* OR exercise* OR education* OR interven* OR treat* OR cure OR management OR car* OR recover* OR habilitation OR physiotherap* OR activit* OR massage* OR "manual lymph drainage") | [17,926,407](https://lib-proxy.wmu.edu.cn/https/vpn/17/P7TXE55GPNSXT3LPMNTT6Z5MMF3GT7UBPSTT6Z5P/wos/medline/summary/e93d0bed-6fe8-4f52-a620-10cd5fd73d28-01225d2309/relevance/1) |
| #17 | #15 OR #16 | [17,974,451](https://lib-proxy.wmu.edu.cn/https/vpn/17/P7TXE55GPNSXT3LPMNTT6Z5MMF3GT7UBPSTT6Z5P/wos/medline/summary/4ba939ed-a5f3-4a5b-baf4-83b83b3f107c-01225d2c58/relevance/1) |
| #18 | #17 AND #14 AND #7 | [296](https://lib-proxy.wmu.edu.cn/https/vpn/17/P7TXE55GPNSXT3LPMNTT6Z5MMF3GT7UBPSTT6Z5P/wos/medline/summary/cd4557c0-5736-4126-9e55-eab00e91fcb0-01225d3da0/relevance/1) |

CINAHL (n=80)

Table 5 Search strategy and results for CINAHL (2024-11-8 23:55)

| Search | Query | Items found |
| --- | --- | --- |
| #1 | [MH (MH "Gynecology") OR TI (gynecolog* OR gynaecolog* OR endometri* OR cervi* OR ocer* OR vagina*) OR AB (gynecolog* OR gynaecolog* OR endometri* OR cervi* OR ocer* OR vagina*)](https://research.ebsco.com/search/results?db=rzh&expanders=fullText&expanders=concept&limiters=None&q=MH (MH "Gynecology") OR TI (gynecolog* OR gynaecolog* OR endometri* OR cervi* OR ocer* OR vagina*) OR AB (gynecolog* OR gynaecolog* OR endometri* OR cervi* OR ocer* OR vagina*)&qm=W3sidmFsdWUiOiIoTUggXCJHeW5lY29sb2d5XCIpIiwidHlwZSI6ImZpZWxkIiwiY29kZSI6Ik1IIn0seyJ2YWx1ZSI6Ik9SIiwidHlwZSI6ImxvZ2ljIn0seyJ2YWx1ZSI6Imd5bmVjb2xvZyogT1IgZ3luYWVjb2xvZyogT1IgZW5kb21ldHJpKiBPUiBjZXJ2aSogT1Igb2NlciogT1IgdmFnaW5hKiIsInR5cGUiOiJmaWVsZCIsImNvZGUiOiJUSSJ9LHsidmFsdWUiOiJPUiIsInR5cGUiOiJsb2dpYyJ9LHsidmFsdWUiOiJneW5lY29sb2cqIE9SIGd5bmFlY29sb2cqIE9SIGVuZG9tZXRyaSogT1IgY2VydmkqIE9SIG9jZXIqIE9SIHZhZ2luYSoiLCJ0eXBlIjoiZmllbGQiLCJjb2RlIjoiQUIifV0=&searchMode=all&sort=relevance&isDashboardExpanded=true) | 138,273 |
| #2 | MH (MH "Neoplasms+") OR TI (neoplas* OR tumor* OR tumour* OR cancer* OR malignan*) OR AB (neoplas* OR tumor* OR tumour* OR cancer* OR malignan*) | 918,582 |
| #3 | MH (MH "Lymphedema+") OR MH (MH "Lipedema") OR TI (lymphedema* OR lymphoedem* OR lymph*tic) OR AB (lymphedema* OR lymphoedem* OR lymph*tic) | 23,725 |
| #4 | MH (MH "Lower Extremity+") OR MH (MH "Leg") OR TI ("lower extremit*" OR leg* OR "lower limb*" OR "extremit* lower" OR "limb*, lower" OR "membrum inferius") OR AB ("lower extremit*" OR leg* OR "lower limb*" OR "extremit* lower" OR "limb*, lower" OR "membrum inferius") | 204,811 |
| #5 | MH (MH "Therapeutics+") OR MH (MH "Rehabilitation+") OR MH (MH "Exercise+") OR MH (MH "Education+") OR TI (therap* OR nurs* OR rehabilitat* OR exercise* OR education* OR interven* OR treat* OR cure OR management OR car* OR recover* OR habilitation OR physiotherap* OR activit* OR massage* OR "manual lymph drainage") OR AB (therap* OR nurs* OR rehabilitat* OR exercise* OR education* OR interven* OR treat* OR cure OR management OR car* OR recover* OR habilitation OR physiotherap* OR activit* OR massage* OR "manual lymph drainage") | 5,153,604 |
| #6 | #1 AND #2 AND #3 AND #4 AND #5 | 80 |

SCOPUS (n=109)

Table 6 Search strategy and results for Scopus (2024-11-8 17:02)

| Search | Query | Items found |
| --- | --- | --- |
| #1 | TITLE-ABS-KEY(gynecolog* OR gynaecolog* OR endometri* OR cervi* OR ocer* OR vagina*) | 1,001,825 |
| #2 | TITLE-ABS-KEY(neoplas* OR tumor* OR tumour* ORcancer* OR malignan*) | 794,041 |
| #3 | #2 AND #1 | 61,241 |
| #4 | TITLE-ABS-KEY(lymphedema* OR lymphoedem* OR lymph*tic) | 463,070 |
| #5 | TITLE-ABS-KEY("lower extremit*" OR leg* OR "lower limb*" OR "extremit* lower" OR "limb*, lower" OR "membrum inferius") | 2,071,359 |
| #6 | #4 AND #5 | 12,290 |
| #7 | TITLE-ABS-KEY(therap* OR nurs* OR rehabilitat* OR exercise* OR education* OR interven* OR treat* OR cure OR management OR car* OR recover* OR habilitation OR physiotherap* OR activit* OR massage* OR "manual lymph drainage") | 41,469,355 |
| #8 | #3 AND #6 AND #7 | 109 |
